# Supplementary material for: Co-Lateral Effect of Octenidine, Chlorhexidine and Colistin Selective Pressures on Four Enterobacterial Species: A Comparative Genomic Analysis
Source: MDPI journal article supplement (doi:10.3390/antibiotics11010050), 2021-12-31
Supplement: s1 [file antibiotics-1450369-supplementary.pdf › antibiotics-1450369-supplementary.pdf]

| Isolate                               | Bacterial species    | Mutation targeted gene              | Associated protein information                                                                                                                                              | Mutation                   | Mutation type                     | Colistin MIC | Chlrohexidine MIC | Oxetidine MIC | Cefotaxime MIC | Ciprofloxacin MIC | AMX | AMXCLAV | TK | TCCLAV | PIPTAZ | PIP | TEM | FOX | CTX | AZT | CAZ | FEP | IMP | ERT | GEN | NET | TOB | AMK | NAL | OPX | CIP | SXT | POS |
|---------------------------------------|----------------------|-------------------------------------|-----------------------------------------------------------------------------------------------------------------------------------------------------------------------------|----------------------------|-----------------------------------|--------------|-------------------|---------------|----------------|-------------------|-----|---------|----|--------|--------|-----|-----|-----|-----|-----|-----|-----|-----|-----|-----|-----|-----|-----|-----|-----|-----|-----|-----|
| <i>Enterobacter cloacae</i> wild type | <i>E. cloacae</i>    | /                                   | /                                                                                                                                                                           | /                          | /                                 | 0.125        | 10                | 2.5           | 0.0125         | 0.016             | 9   | 9       | 30 | 33     | 28     | 26  | 31  | 7   | 29  | 38  | 28  | 35  | 31  | 32  | 22  | 28  | 23  | 24  | 25  | 35  | 40  | 30  | 21  |
| COL-M1                                | <i>E. cloacae</i>    | - / → Gene_01288                    | NA /Hypothetical protein 85% homologous to YnfG                                                                                                                             | G→T                        | intogenic                         | 32           | 40                | 2.5           | 0.023          | 0.012             | 8   | 8       | 26 | 26     | 24     | 23  | 25  | 6   | 24  | 34  | 24  | 30  | 24  | 27  | 23  | 23  | 21  | 22  | 24  | 33  | 38  | 28  | 19  |
| CHX-M1                                | <i>E. cloacae</i>    | hamA ←<br>mptA →<br>hamC ←<br>hml → | Outer membrane protein assembly factor HamA<br>MltA interacting protein<br>Outer membrane protein assembly factor HamC<br>TerR/AcrR family transcriptional regulator family | Δ1 bp<br>T→A<br>A→C<br>C→T | deletion<br>Y2108<br>*94E<br>P66L | 8            | 160               | 2.5           | 0.5            | 0.064             | 8   | 8       | 27 | 27     | 19     | 24  | 20  | 6   | 23  | 37  | 26  | 29  | 29  | 31  | 26  | 29  | 26  | 26  | 23  | 31  | 38  | 28  | 20  |
| CHX-M2                                | <i>E. cloacae</i>    | asd → / → glfB                      | Aspartate-semialdehyde dehydrogenase/1,4-alpha-glucan branching enzyme                                                                                                      | G→T                        | intogenic                         | 8            | 160               | 2.5           | 0.5            | 0.125             | 8   | 8       | 26 | 28     | 20     | 23  | 22  | 6   | 24  | 36  | 27  | 32  | 28  | 28  | 26  | 30  | 26  | 25  | 22  | 31  | 37  | 26  | 20  |
|                                       |                      | hml →                               | TerR/AcrR family transcriptional regulator family                                                                                                                           | G→A                        | G187R                             |              |                   |               |                |                   |     |         |    |        |        |     |     |     |     |     |     |     |     |     |     |     |     |     |     |     |     |     |     |
| OCT-M1                                | <i>E. cloacae</i>    | Gene_02347 →<br>nasD ← / ← tsgA     | Putative membrane protein with AamA-like domain, 65% identity with YnfP from <i>Escherichia coli</i> K-12<br>Nitrite reductase [NAD(P)H] transmembrane transporter          | G→A<br>C→A                 | G1114R                            | 0.125        | 20                | 5.0           | 0.25           | 0.047             | 6   | 6       | 29 | 28     | 24     | 24  | 23  | 10  | 27  | 38  | 29  | 34  | 30  | 35  | 25  | 29  | 26  | 26  | 15  | 30  | 38  | 24  | 21  |
| OCT-M2                                | <i>E. cloacae</i>    | ompX                                | Outer membrane Protein X precursor                                                                                                                                          | A→G                        | L14P                              | 0.125        | 20                | 2.5           | 0.25           | 0.047             | 6   | 6       | 25 | 25     | 21     | 21  | 23  | 6   | 24  | 35  | 26  | 34  | 30  | 35  | 25  | 25  | 24  | 25  | 15  | 28  | 31  | 25  | 20  |
| <i>Escherichia coli</i> wt            | <i>E. coli</i>       | /                                   | /                                                                                                                                                                           | /                          | /                                 | 0.125        | 0.625             | 2.5           | 0.032          | 0.008             | 25  | 27      | 30 | 35     | 29     | 27  | 23  | 27  | 36  | 40  | 33  | 38  | 37  | 37  | 27  | 29  | 26  | 29  | 25  | 39  | 40  | 32  | 33  |
| CHX-M3                                | <i>E. coli</i>       | mptA →                              | MltA interacting protein                                                                                                                                                    | A→G                        | intogenic                         | 0.125        | 2.5               | 1.25          | 0.032          | 0.008             | 24  | 30      | 29 | 34     | 27     | 23  | 21  | 29  | 38  | 40  | 32  | 38  | 37  | 31  | 28  | 29  | 27  | 29  | 32  | 40  | 40  | 40  | 31  |
| CHX-M4                                | <i>E. coli</i>       | yybB →                              | putative transporter YybB                                                                                                                                                   | A→C                        | K123T                             | <0.1         | 1.25              | 1.25          | 0.032          | 0.0016            | 24  | 28      | 31 | 34     | 29     | 29  | 22  | 29  | 35  | 40  | 32  | 38  | 32  | 40  | 31  | 40  | 36  | 40  | 31  | 40  | 40  | 40  | 29  |
| <i>Klebsiella oxytoca</i> wt          | <i>K. oxytoca</i>    | /                                   | /                                                                                                                                                                           | /                          | /                                 | 0.125        | 9                 | 1.7           | 0.016          | 0.016             | 6   | 34      | 13 | 35     | 31     | 19  | 30  | 32  | 37  | 40  | 36  | 39  | 40  | 40  | 28  | 26  | 29  | 30  | 29  | 37  | 40  | 34  | 21  |
| COL-M2                                | <i>K. oxytoca</i>    | phoQ ←<br>ls ←<br>lptD ←            | Sensor protein PhoQ<br>Transketolase<br>LPS assembly protein LptD                                                                                                           | A→C<br>C→G<br>T→G          | M293R<br>D174H<br>T672P           | 96           | 20                | 2.5           | 0.016          | 0.012             | 6   | 29      | 6  | 30     | 20     | 17  | 26  | 22  | 33  | 38  | 30  | 37  | 36  | 28  | 26  | 30  | 29  | 29  | 22  | 32  | 39  | 30  | 21  |
| COL-M3                                | <i>K. oxytoca</i>    | phoQ ←                              | Sensor protein PhoQ                                                                                                                                                         | C→A                        | K354N                             | 128          | 16.7              | 2.0           | 0.032          | 0.012             | 6   | 36      | 6  | 40     | 29     | 19  | 29  | 36  | 36  | 40  | 37  | 38  | 36  | 38  | 26  | 27  | 27  | 23  | 30  | 40  | 40  | 32  | 22  |
| CHX-M5                                | <i>K. oxytoca</i>    | phoQ ←<br>lpxJ ←<br>mvaA ←          | Sensor protein PhoQ<br>Lpx penase<br>Molybdopterin molybdenumtransferase                                                                                                    | T→G<br>C→T<br>T→A          | K64Q<br>G383D<br>K340M            | 0.125        | 27.5              | 2.3           | 0.016          | 0.016             | 6   | 36      | 6  | 40     | 29     | 19  | 29  | 36  | 36  | 40  | 37  | 38  | 36  | 38  | 26  | 27  | 27  | 23  | 30  | 40  | 40  | 32  | 22  |
| CHX-M6                                | <i>K. oxytoca</i>    | Gene_3346 → / -                     | Stress induced protein with GalB superfamily domain / -                                                                                                                     | C→A                        | intogenic                         | 26.7         | 40                | 2.5           | 0.094          | 0.094             | 6   | 35      | 6  | 33     | 30     | 19  | 30  | 30  | 37  | 40  | 35  | 38  | 40  | 37  | 29  | 28  | 29  | 31  | 31  | 38  | 40  | 40  | 22  |
| OCT-M3                                | <i>K. oxytoca</i>    | hml3R1_1                            | TerR/AcrR family transcriptional regulator family                                                                                                                           | + C                        | insertion                         | 0.125        | 16                | 4.2           | 0.094          | 0.094             | 6   | 35      | 6  | 33     | 30     | 19  | 30  | 30  | 37  | 40  | 35  | 38  | 40  | 37  | 29  | 28  | 29  | 31  | 31  | 38  | 40  | 40  | 22  |
| <i>Klebsiella pneumoniae</i> wt       | <i>K. pneumoniae</i> | /                                   | /                                                                                                                                                                           | /                          | /                                 | 0.25         | 10                | 1.25          | 0.032          | 0.032             | 6   | 29      | 10 | 30     | 26     | 19  | 28  | 27  | 33  | 37  | 31  | 35  | 33  | 34  | 28  | 30  | 25  | 25  | 25  | 35  | 40  | 36  | 18  |
| COL-M4                                | <i>K. pneumoniae</i> | rhlB_2 →                            | Sensor protein RaiB                                                                                                                                                         | C→A                        | D122E                             | 256          | 10                | 1.25          | 0.032          | 0.016             | 6   | 27      | 6  | 24     | 19     | 18  | 18  | 14  | 30  | 40  | 26  | 32  | 38  | 36  | 29  | 31  | 29  | 29  | 18  | 28  | 36  | 26  | 22  |
| COL-M5                                | <i>K. pneumoniae</i> | rhlB_2 →<br>lptD ←                  | Sensor protein RaiB<br>LPS assembly protein LptD                                                                                                                            | C→T<br>T→G                 | P131L<br>T491P                    | 256          | 10                | 1.25          | 0.032          | 0.016             | 6   | 25      | 6  | 23     | 16     | 16  | 15  | 16  | 30  | 37  | 24  | 33  | 37  | 36  | 28  | 30  | 28  | 17  | 26  | 34  | 24  | 20  |     |
| CHX-M7                                | <i>K. pneumoniae</i> | smaA ←<br>malt_2 →                  | Methyl viologen resistance protein SmvA<br>HTH-type transcriptional regulator MatT                                                                                          | C→A<br>G→A                 | intogenic<br>E159K                | 0.25         | 40                | 1.25          | 0.032          | 0.016             | 6   | 29      | 10 | 30     | 26     | 19  | 28  | 27  | 33  | 37  | 31  | 35  | 33  | 34  | 28  | 30  | 25  | 25  | 25  | 35  | 40  | 36  | 18  |
| CHX-M8                                | <i>K. pneumoniae</i> | uvrA ←<br>smaA ←<br>ramR ←          | UDP-glucose: undecaprenyl phosphate glucose-1-phosphate transferase<br>Methyl viologen resistance protein SmvA<br>TerR/AcrR family transcriptional regulator family         | (A)5 → 6<br>C→T<br>G→A     | insertion<br>A368T<br>Q122*       | 0.25         | 20                | 1.25          | 0.032          | 0.016             | 6   | 29      | 10 | 30     | 26     | 19  | 28  | 27  | 33  | 37  | 31  | 35  | 33  | 34  | 28  | 30  | 25  | 25  | 25  | 35  | 40  | 36  | 18  |
| OCT-M4                                | <i>K. pneumoniae</i> | Gene_04779 ←                        | Putative membrane protein with AamA-like domain, 72% identity with YnfP from <i>Escherichia coli</i> K-12                                                                   | C→T                        | W495*                             | 0.25         | 10                | 2.5           | 0.25           | 0.125             | 6   | 29      | 10 | 30     | 26     | 19  | 28  | 27  | 33  | 37  | 31  | 35  | 33  | 34  | 28  | 30  | 25  | 25  | 25  | 35  | 40  | 36  | 18  |
| OCT-M5                                | <i>K. pneumoniae</i> | smaA ←<br>ramR ←                    | Methyl viologen resistance protein SmvA<br>TerR/AcrR family transcriptional regulator family                                                                                | G→A<br>Δ1bp                | A474V<br>deletion                 | 0.25         | 20                | 2.5           | 0.38           | 0.125             | 6   | 29      | 10 | 30     | 26     | 19  | 28  | 27  | 33  | 37  | 31  | 35  | 33  | 34  | 28  | 30  | 25  | 25  | 25  | 35  | 40  | 36  | 18  |
